# Supplementary material for: Templated solvothermal synthesis of magnesium silicate hollow nanospheres with ultrahigh specific surface area and their application in high-performance protein adsorption and drug delivery
Source: Royal Society of Chemistry journal article supplement (doi:10.1039/c5tb02632f), 2016-01-01
Supplement: c5tb02632f1.pdf [file c5tb02632f1.pdf]

## Electronic Supplementary Information

### **Templated solvothermal synthesis of magnesium silicate hollow nanospheres with ultrahigh specific surface area and their application in high-performance protein adsorption and drug delivery**

Tuan-Wei Sun, Ying-Jie Zhu\*, Chao Qi, Feng Chen\*, Ying-Ying Jiang, Yong-Gang Zhang, Jin Wu, and Chengtie Wu\*

State Key Laboratory of High Performance Ceramics and Superfine Microstructure, Shanghai Institute of Ceramics, Chinese Academy of Sciences, Shanghai 200050, P. R. China

\*E-mail: y.j.zhu@mail.sic.ac.cn (Y. J. Zhu); Fax: +86-21-52413122; Tel: +86-21-52412616

fchen@mail.sic.ac.cn (F. Chen)

chengtiewu@mail.sic.ac.cn (C. T. Wu).

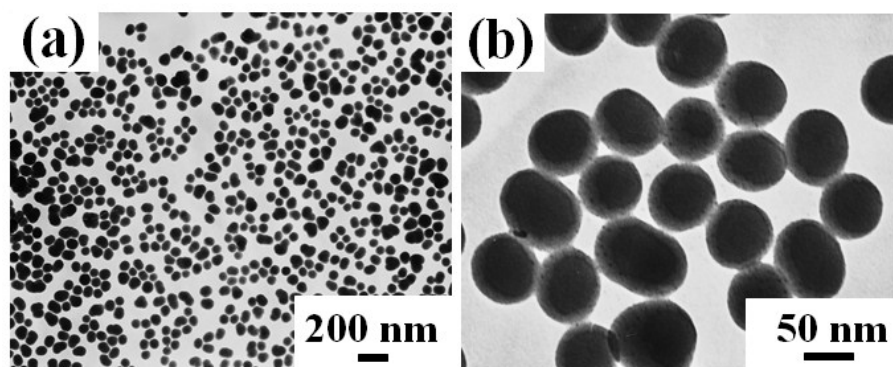

Figure S1. Transmission electron microscopy (TEM) micrographs of silica nanospheres synthesized by the classical Stöber method.

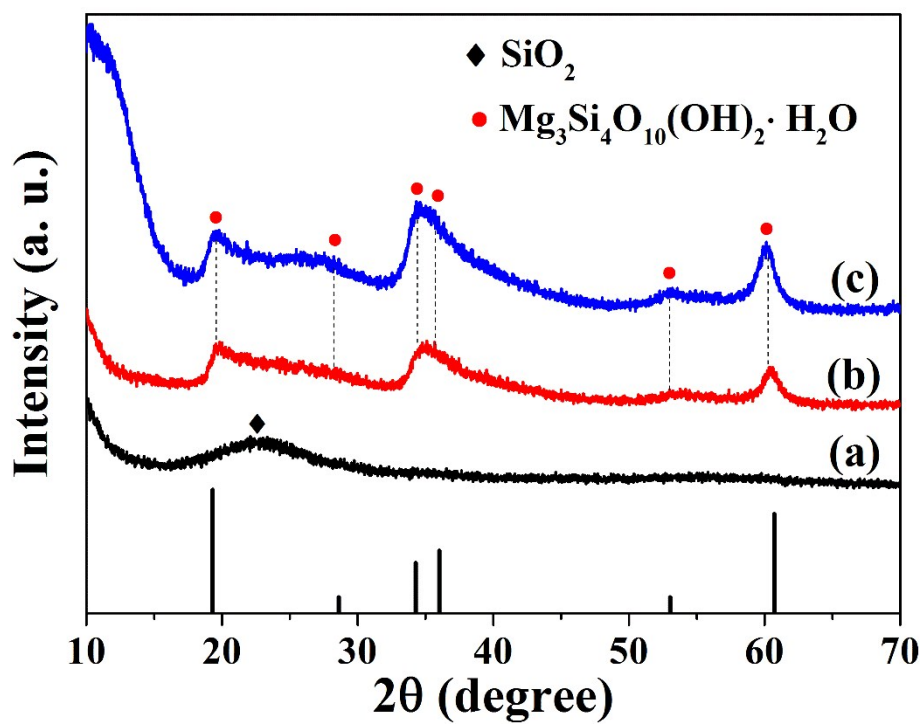

Figure S2. XRD patterns of magnesium silicate nanostructured materials synthesized by the templated solvothermal method at 120 °C for different times: (a) 2 h; (b) 6 h; (c) 18 h.

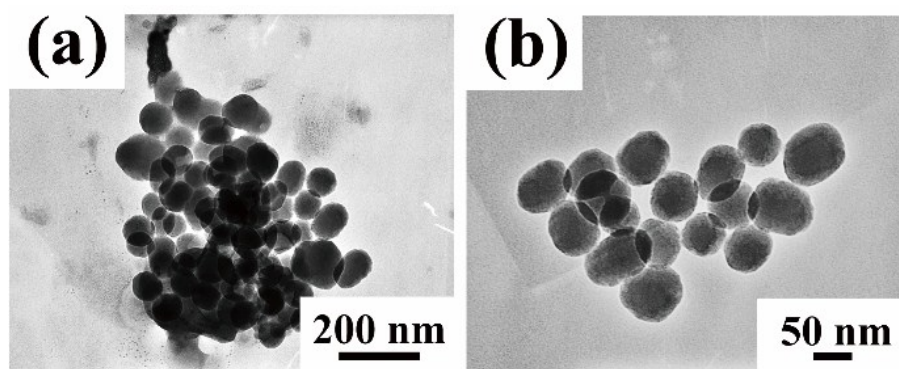

Figure S3. TEM micrographs of silica nanospheres prepared in the absence of sodium acetate by the solvothermal method at 120 °C for 24 h.

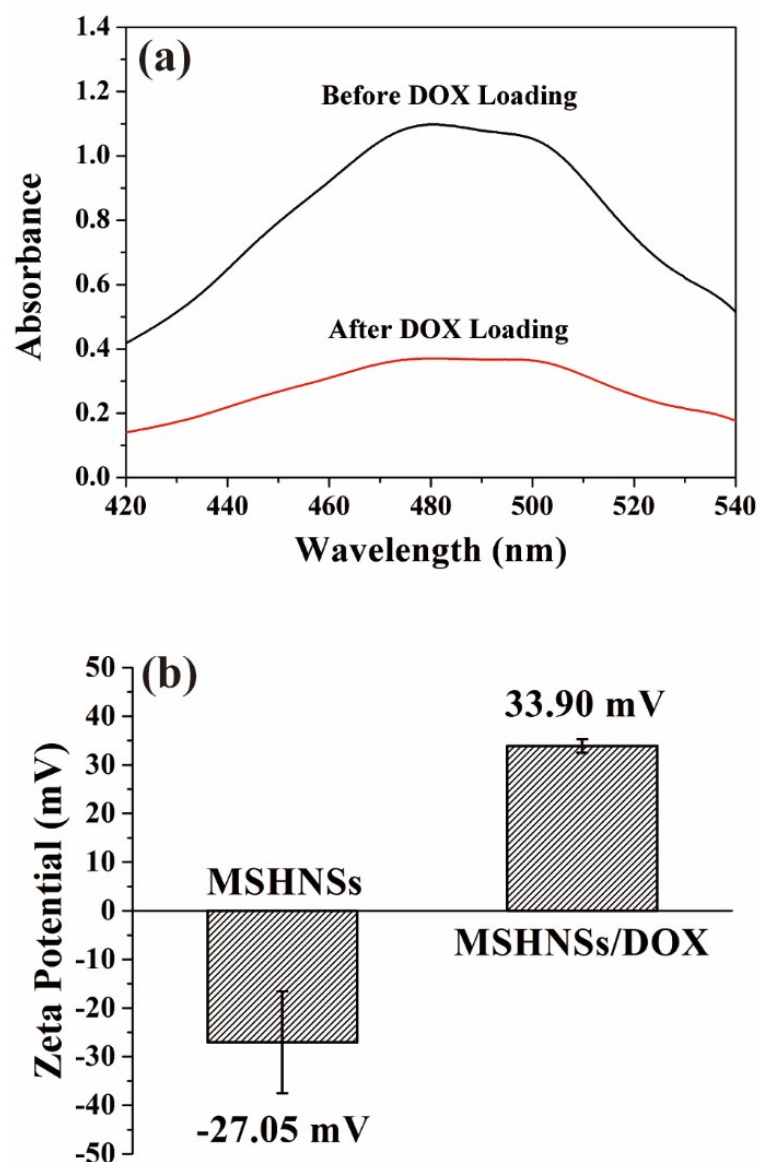

Figure S4. UV-vis absorption spectra (a) and zeta potentials (b) of magnesium silicate hollow nanospheres (MSHNSs) synthesized by the templated solvothermal method at 120 °C for 24 h, with and without loading a typical anticancer drug DOX.

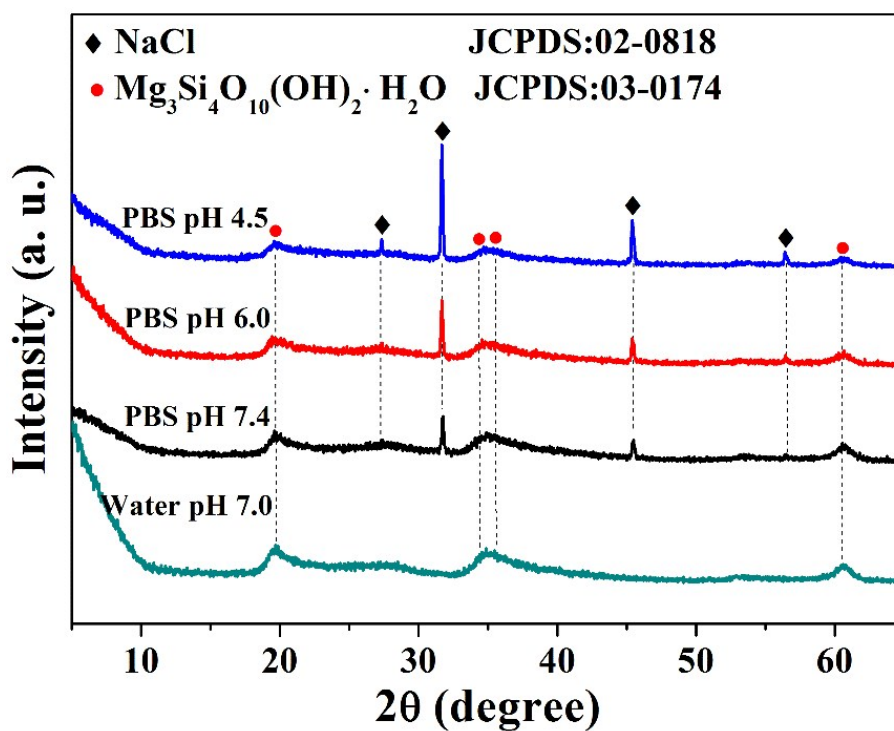

Figure S5. XRD patterns of the MSHNSs after immersion in deionized water and the phosphate buffered saline (PBS) with different pH values for 144 h.
